# Supplementary material for: Novel Androgen Receptor Coregulator GRHL2 Exerts Both Oncogenic and Antimetastatic Functions in Prostate Cancer
Source: Oxford University Press journal article supplement (doi:10.1158/0008-5472.can-16-1616), 2017-05-05
Supplement: 00085472can161616-sup-167555_3_unknown_upload_3966224_cc0xkc.xlsx [file 00085472can161616-sup-167555_3_unknown_upload_3966224_cc0xkc.xlsx]

## Sheet: Supplementary Table 3
GRHL2-specific cistrome
JASPAR ID	Factor	Enrichment*	p value
MA0647.1	GRHL	3.22971	7.68897e-119
MA0148.1	FOXA1	1.29435	7.31455e-16
MA0047.2	FOXA2	1.25941	1.76521e-11
MA0092.1	Hand1::Tcfe2a	1.21394	1.34848e-10
MA0144.1	Stat3	1.27624	1.97189e-10
MA0161.1	NFIC	1.22129	1.20202e-09
MA0130.1	ZNF354C	1.14487	9.49058e-08
MA0080.2	SPI1	1.19967	1.98551e-07
MA0103.1	ZEB1	1.10896	1.13004e-06
MA0007.1	AR	1.3091	1.82526e-05
MA0145.1	Tcfcp2l1	1.12721	0.000112958
MA0157.1	FOXO3	1.10934	0.000280861
MA0081.1	SPIB	1.09232	0.000791916
MA0056.1	MZF1_1-4	1.08626	0.000887525
MA0137.2	STAT1	1.15673	0.000977776
MA0098.1	ETS1	1.10298	0.00154684
MA0099.2	AP1	1.08733	0.00192543
MA0119.1	TLX1::NFIC	1.51319	0.00299943
MA0160.1	NR4A2	1.08725	0.00425284
MA0112.2	ESR1	1.0867	0.0043832
MA0156.1	FEV	1.08628	0.00533116
MA0101.1	REL	1.10201	0.00591233
MA0091.1	TAL1::TCF3	1.1378	0.00619998
MA0114.1	HNF4A	1.08404	0.00788103
MA0048.1	NHLH1	1.12569	0.00813319
MA0062.2	GABPA	1.122	0.00897956
MA0002.2	RUNX1	1.08073	0.00989919
MA0258.1	ESR2	1.10266	0.0110656
MA0159.1	RXR::RAR_DR5	1.14238	0.0133531
MA0030.1	FOXF2	1.1356	0.015484
MA0031.1	FOXD1	1.08858	0.0251805
MA0088.1	znf143	1.15213	0.0255344
MA0065.2	PPARG::RXRA	1.06595	0.0336458
MA0133.1	BRCA1	1.09758	0.0365281
MA0146.1	Zfx	1.06039	0.046152
AR-specific cistrome
JASPAR ID	Factor	Enrichment*	p value
MA0007.1	AR	3.7333	2.75903e-29
MA0148.1	FOXA1	1.86555	3.49542e-23
MA0047.2	FOXA2	1.71574	1.36086e-15
MA0030.1	FOXF2	1.67408	4.03863e-06
MA0031.1	FOXD1	1.36686	3.16437e-05
MA0258.1	ESR2	1.3612	0.00023056
MA0113.1	NR3C1	1.48223	0.000266628
MA0103.1	ZEB1	1.16568	0.000770959
MA0144.1	Stat3	1.29867	0.0019076
MA0119.1	TLX1::NFIC	2.46783	0.00318152
MA0157.1	FOXO3	1.18082	0.00402506
MA0150.1	NFE2L2	1.31887	0.00762927
MA0112.2	ESR1	1.21341	0.00844404
MA0161.1	NFIC	1.19796	0.0118931
MA0154.1	EBF1	1.1778	0.0128488
MA0066.1	PPARG	1.78731	0.0190256
MA0141.1	Esrrb	1.19585	0.0273896
MA0056.1	MZF1_1-4	1.13049	0.0300167
MA0095.1	YY1	1.13833	0.0372363
Shared cistrome
JASPAR ID	Factor	Enrichment*	p value
MA0007.1	AR	11.1748	1.69036e-08
MA0092.1	Hand1::Tcfe2a	2.16046	0.00111712
MA0647.1	GRHL	4.27635	0.00262318
MA0100.1	Myb	2.21873	0.00350961
MA0141.1	Esrrb	2.1242	0.00568389
MA0148.1	FOXA1	1.61743	0.0130457
MA0002.2	RUNX1	1.68968	0.014106
MA0113.1	NR3C1	2.15203	0.0301615
MA0105.1	NFKB1	2.78798	0.0305002
*Fold enrichment over genome average
