# Supplementary material for: Novel Androgen Receptor Coregulator GRHL2 Exerts Both Oncogenic and Antimetastatic Functions in Prostate Cancer
Source: Oxford University Press journal article supplement (doi:10.1158/0008-5472.can-16-1616), 2017-05-05
Supplement: 00085472can161616-sup-167555_3_unknown_upload_3966225_dd0xkv.xlsx [file 00085472can161616-sup-167555_3_unknown_upload_3966225_dd0xkv.xlsx]

## Sheet: Supplementary Table 4
Gene	log2 fold change	p (adjusted)
EPN3	-3.16385	0
MAP1B	1.37594	0
PRUNE2	1.13825	0
ALDH3B2	-4.69989	1.44436e-299
ALOX15	-2.51414	8.21141e-241
ZBTB43	1.18998	1.8696e-182
DUSP16	-1.09449	1.45306e-161
ERBB3	-1.24159	7.01516e-155
ARHGAP32	-1.09902	3.50088e-147
PLA2G4F	-2.17071	4.25644e-144
GRHL2	-1.25669	8.03673e-139
CAB39L	-1.61	1.44005e-133
RGL2	-1.50722	3.0474e-128
SFTPA2	-3.23385	8.76026e-121
SLC7A8	-1.10838	8.86547e-117
TNFRSF10D	0.862644	1.17241e-116
KIAA1522	-1.0126	2.30847e-115
LAD1	-0.999965	2.2885e-114
LPIN1	-0.841075	1.47302e-111
SEMA4A	-2.43943	1.49454e-110
PROM2	-1.2971	2.71953e-108
LOC100128338	-1.15843	6.08715e-107
BTG1	-0.761795	1.66151e-104
NAV3	-2.85147	3.57613e-101
CGN	-1.25584	9.45716e-94
LDHB	0.464293	9.68946e-89
RHOU	-1.67374	9.82532e-89
TMEM54	-1.54608	3.16214e-88
SULT2B1	-3.89392	1.28457e-86
SYT7	-1.60854	7.02238e-86
PVRL4	-3.81647	2.12246e-85
CANT1	-0.528562	3.61162e-85
OSBP	-0.592354	1.0717e-80
PRKCH	-1.47479	1.30816e-80
AR	-0.452401	2.30647e-79
RAMP1	0.860151	1.3778e-77
STAP2	-1.52648	2.01529e-76
ARHGEF26-AS1	-3.10956	5.75276e-76
SERINC5	-0.679695	8.77498e-76
SEC11C	0.580842	6.98907e-75
NQO1	-0.853585	9.54094e-75
RAB27B	-2.77303	2.02757e-73
MT2A	0.849745	3.65337e-72
NAALADL2	-1.22807	8.48529e-72
GNG5	1.0355	1.32146e-70
COMT	-1.17429	2.73543e-70
SYT4	-1.65013	3.99253e-70
STX3	-0.790664	1.48786e-68
TUBB4A	1.30233	2.31365e-67
GJB1	-2.60546	4.04453e-67
PPP1R14C	-3.51968	1.80606e-66
CLDN8	-4.15851	1.15917e-65
SLC45A3	0.783405	1.68376e-65
IYD	-3.38515	1.21443e-64
SDC4	-1.63947	9.54508e-64
CARD14	-1.65937	4.3931e-63
SHROOM3	-0.747893	8.13143e-62
CALM1	-0.352933	9.49364e-61
MYCBP2	0.548566	4.31485e-60
DPP7	0.734838	2.16006e-59
COLEC12	-1.06173	2.46592e-59
INPP4B	-3.99403	1.29376e-58
TMPRSS13	-5.07057	1.78972e-58
C20orf151	-2.86496	6.98017e-58
PEG3	-0.676422	2.66146e-57
TFAP2C	-2.08494	4.47145e-57
AKT1	-0.902144	7.60914e-57
ACSL1	-0.77406	1.1097e-56
NUP93	-0.396927	2.54986e-56
ALDH1A3	-1.08378	2.63519e-56
SPATA20	0.592204	8.69186e-56
GALNT3	-1.01847	1.9403e-55
NET1	-0.737948	4.33816e-55
BIRC5	-0.63236	8.56853e-55
STK39	-0.77853	3.90847e-54
RBM47	-0.70253	4.2369e-54
DAAM1	-1.17453	1.95132e-53
ATP7A	-1.28154	2.02933e-53
IDH1	-0.866099	4.44168e-53
SLC9A2	-0.940997	4.44168e-53
SLC39A6	-1.01046	6.011e-53
TK1	0.569976	1.26139e-52
ABHD4	-0.838853	4.92862e-52
SLC37A1	-1.16219	1.11067e-51
DNMBP	-1.38003	1.62366e-51
YWHAB	-0.493803	5.56672e-51
ADRA2A	1.48855	6.8752e-51
DDC	0.863634	1.26086e-50
PSD4	-1.56677	2.52388e-50
CNDP2	-0.322929	3.45889e-50
KIF1C	0.359866	7.96016e-50
A2ML1	-4.38974	1.41141e-49
LOC145837	1.16061	1.78975e-49
TUB	0.644177	2.94528e-49
DOPEY2	-0.685986	1.66698e-48
LOC219347	-1.84522	6.42612e-48
GCG	2.02672	1.759e-47
RBM3	-0.518226	5.17497e-47
INSIG1	-0.56	5.66141e-47
UTRN	-0.503854	7.09988e-47
ALDH4A1	-0.80163	7.53554e-47
APEH	0.319153	1.7727e-46
SLC25A29	0.838061	5.9704e-46
FKBP10	0.546856	1.09477e-45
OSTF1	-1.08502	1.59009e-45
ZNF704	-0.891956	2.40169e-45
GRB10	0.494832	1.11038e-44
ST7	0.79228	2.19159e-44
CDC42SE1	-0.824281	2.29867e-44
MMD	0.726139	1.84047e-43
ETFA	-0.442643	1.97997e-43
APLP1	0.825009	2.40061e-43
MRPL18	0.623322	3.49262e-43
FRY	1.024	6.78558e-43
TJP2	-1.04479	1.23142e-42
PART1	-2.66244	1.73115e-42
QSOX1	0.749252	3.44994e-42
PRDX1	-0.272439	4.29784e-42
LOC100128098	-1.11957	5.78195e-42
MTFR1	-0.697661	9.21332e-42
C1orf55	-0.881563	2.36549e-41
IDH2	-0.545961	5.66287e-41
C17orf28	-0.691074	5.92926e-41
RAB3B	0.591085	7.06288e-41
ADAMTS1	-0.497029	4.79516e-40
CSNK1A1	-0.352908	1.35098e-39
DIO1	-1.72534	1.77879e-39
WWC3	-1.7469	5.8179e-39
PRDX5	0.486867	6.75768e-39
GGCT	-0.645476	6.7822e-39
RHOV	-1.31374	8.34792e-39
ZBTB42	-0.828936	6.43121e-38
FRRS1	-1.92473	8.47514e-38
SLFN5	-1.01423	1.0729e-37
CBR3-AS1	-1.62444	1.12639e-37
MARK2	-0.580199	1.26119e-37
APLP2	-0.648915	2.42624e-37
FGFRL1	0.446502	2.77671e-37
SYNE2	-0.458221	3.09285e-37
TSPAN4	1.49747	5.04044e-37
TC2N	-0.913665	7.17475e-37
SURF4	0.345571	7.28838e-37
TRPM8	-1.13792	1.058e-36
NOX5	-5.41198	1.22387e-36
PTRH2	-0.731824	1.36511e-36
SEMA3F	-1.2019	3.81983e-36
CCNG2	-0.795065	9.40805e-36
IL36RN	-5.87598	1.4936e-35
DBN1	0.507714	1.95697e-35
ATP10A	-1.87219	2.21229e-35
CDC73	-0.730446	3.19664e-35
BROX	-0.683213	7.87288e-35
SRCIN1	-2.8717	8.76349e-35
CRISP3	-5.09427	1.061e-34
ZNF812	-1.5997	1.92501e-34
ANKRD22	-2.93388	2.17013e-34
MARVELD1	0.518594	3.79249e-34
UBE2G2	0.523431	3.94759e-34
MAP2	-1.02194	4.81719e-34
EFNA5	0.329614	7.72034e-34
TMEM201	0.490891	1.08769e-33
BMF	-1.12804	1.35338e-33
LYRM7	-0.761332	1.37314e-33
HN1L	-0.44541	1.62099e-33
PRAME	0.439137	1.65015e-33
C9orf152	-1.07323	2.92557e-33
RASSF3	-0.324676	3.05649e-33
DNASE1	-0.962973	5.58269e-33
GPR160	-1.20297	6.24236e-33
TACC1	-0.494018	6.26986e-33
DHRS7	-0.618139	7.11287e-33
DIAPH1	-0.464227	2.06073e-32
RNF145	-0.542812	2.07574e-32
SLC29A1	0.572514	4.92296e-32
MCCC2	0.535996	7.21561e-32
STAT3	-0.548895	7.8016e-32
PKIB	-1.72335	9.66347e-32
DDB2	0.737763	1.23504e-31
LRRN1	0.614247	5.41889e-31
PPP1R3B	-1.05254	5.7096e-31
GSR	-0.372465	8.45028e-31
TMEM79	-0.962011	9.18094e-31
IGF2R	0.46111	9.57452e-31
ALDH2	0.75945	1.1953e-30
FN1	-0.50395	1.29273e-30
SMC1A	0.346279	1.8046e-30
RHOB	-0.631285	2.03564e-30
FADS1	-0.449856	3.34536e-30
RAB6A	-0.447283	6.99931e-30
CERS2	0.571447	1.22738e-29
NUPL1	-0.664941	1.61856e-29
BAI2	1.97307	1.78614e-29
PIK3R3	-0.595722	2.20782e-29
LGI2	1.53999	2.47207e-29
DBI	-0.324494	2.55181e-29
RBPMS	0.958372	6.8217e-29
TNRC6B	-0.348919	7.05135e-29
FYCO1	-0.395762	9.82023e-29
GCHFR	1.2501	1.16842e-28
SCD	-0.454479	1.30406e-28
SSFA2	-0.713918	1.45875e-28
SYPL1	-0.710475	1.49362e-28
NAV1	0.743863	1.92769e-28
LOC92249	-0.756227	2.27045e-28
PPP1R12A	-0.666239	2.58684e-28
GRAMD1C	-1.38896	2.8489e-28
RLN2	1.17912	3.68388e-28
SPINT2	0.384499	4.94407e-28
MYH10	0.353649	6.06936e-28
CLDN4	-0.595519	6.24595e-28
CTXN1	1.17537	8.31812e-28
WSB2	-0.542305	1.2175e-27
MYRIP	-0.812633	1.37291e-27
FDFT1	-0.656066	1.76226e-27
TMEM129	0.477717	3.02958e-27
TSPAN3	0.562213	3.40083e-27
CA13	-1.95227	3.54843e-27
MICAL1	-1.01119	3.71402e-27
SLC39A3	0.486039	9.13765e-27
ADD3	-0.495922	2.45694e-26
ADD1	-0.369892	2.78655e-26
SLC43A1	0.593406	3.58726e-26
TANC1	-0.371618	3.73258e-26
MYL6B	0.703691	3.83114e-26
LEPRE1	0.748699	5.8976e-26
NRP1	0.510318	6.5391e-26
KIAA0232	-0.698097	7.0568e-26
SAR1B	-0.682435	7.34938e-26
KLF9	-0.620106	7.37679e-26
EZR	-0.372574	1.10088e-25
EML4	-0.648594	1.35304e-25
PYROXD2	-1.57754	1.46236e-25
LMF2	0.730481	1.47745e-25
LSR	0.438178	1.50551e-25
CRKL	-0.525837	1.57841e-25
CLDN7	0.409249	1.58805e-25
C9orf46	0.511159	1.63192e-25
GDF11	0.620352	2.31218e-25
KIAA1217	-0.741452	2.42701e-25
KLK3	-0.531088	2.43397e-25
IRF6	-0.610814	3.14841e-25
EI24	-0.297686	3.78173e-25
SORBS2	-0.566894	3.82319e-25
APPL2	-0.507143	4.22033e-25
CDH1	-0.480303	4.50406e-25
SORBS3	0.904889	4.50406e-25
UGT2B15	-0.607824	5.19142e-25
FIBP	0.409379	5.51754e-25
CBLN2	0.739715	6.19648e-25
EIF4EBP2	-0.315899	7.23548e-25
CCDC88A	0.797184	7.36111e-25
TBRG1	-0.486952	9.45782e-25
ARSD	-0.777182	9.91407e-25
HADHB	-0.402264	1.16571e-24
AP1S1	-0.338811	1.46791e-24
GPR158	-0.528081	2.11077e-24
CBX5	-0.344417	2.29309e-24
GPR107	-0.314141	2.38674e-24
LINC00094	0.571044	2.55633e-24
MAP1A	1.43795	2.98e-24
PLK2	0.584744	3.90482e-24
OVOL1	-2.89176	3.91567e-24
PSMD7	-0.351274	5.24363e-24
ASB13	-0.63917	5.71358e-24
ABCB6	0.649448	6.05474e-24
TSC2	-0.472084	7.27167e-24
SMAGP	-2.31379	9.55191e-24
ACSL3	0.372882	9.99613e-24
MKI67	0.452565	1.28799e-23
M6PR	0.547016	1.3257e-23
G6PC3	0.571935	1.35027e-23
SF3B1	-0.388561	1.55337e-23
MLST8	0.44419	1.87356e-23
SLC39A7	0.363716	1.92044e-23
TOM1L2	-0.561651	2.55101e-23
CDK19	-0.512664	2.58518e-23
IGFBP2	0.450332	2.60209e-23
TMEM132A	0.34911	2.90621e-23
ATP1B3	0.395011	3.72287e-23
DUT	0.502086	3.96844e-23
IDI1	-0.538799	4.79301e-23
C1orf21	-0.461266	5.43918e-23
SLC41A1	0.546535	5.43918e-23
RABGAP1	-0.40562	5.89504e-23
SLC4A2	0.366683	6.79267e-23
C11orf92	-0.523691	8.12892e-23
CUL4B	-0.550805	8.9928e-23
GOLPH3	-0.385703	9.6208e-23
RHOC	-0.380613	9.95781e-23
LINC00161	-1.08782	1.02351e-22
HMGCR	-0.463761	1.03878e-22
ANG	1.76302	1.09464e-22
ACER2	-1.04267	1.28991e-22
RAB11A	-0.48013	1.56667e-22
ANK3	-0.422186	1.9406e-22
LAMB1	1.53346	2.15178e-22
CGNL1	-1.03978	2.35895e-22
FAM110A	-1.17333	2.36724e-22
SNTB2	-0.568589	2.49453e-22
ARHGAP28	-0.610005	3.16547e-22
ATOX1	-0.754511	4.41803e-22
ABHD8	0.621348	4.8648e-22
CRLS1	0.440621	4.93002e-22
VPS37C	-0.587904	4.95499e-22
SH3GLB2	-0.452982	5.05104e-22
DIO3	-2.11586	5.55934e-22
FKBP5	-0.46654	5.75361e-22
ITPKB	-0.68306	7.24362e-22
ATP8B2	1.01715	7.3622e-22
LOC100129034	-0.352918	7.90403e-22
ELP2	-0.490419	8.57711e-22
UROD	0.48933	8.66511e-22
SLITRK3	0.592269	9.3189e-22
DARS2	-0.4061	9.36932e-22
IGSF9	-0.93795	1.74513e-21
DALRD3	0.804093	1.76876e-21
UBP1	0.370163	2.16313e-21
AFF1	-0.430312	2.38367e-21
PCBP4	0.838209	2.53878e-21
RAB3D	-0.320245	2.77312e-21
GLYATL1	-0.561513	3.15072e-21
CHST3	0.748493	4.6362e-21
HIPK1	-0.409242	4.72539e-21
BCL2L13	-0.38917	5.02544e-21
GPR126	-0.329211	5.20017e-21
EFNA1	-0.755223	5.33991e-21
FERMT2	1.20894	7.31852e-21
FECH	-0.304405	8.60364e-21
ZFHX3	-0.353022	8.82919e-21
PHF19	1.206	9.52295e-21
DDAH1	-0.476143	2.02697e-20
TRIM38	-1.02652	2.24553e-20
LIPA	-0.511418	2.26433e-20
TACC2	-0.459741	2.2886e-20
AKTIP	-0.644207	4.15223e-20
FAM110B	1.83312	4.18987e-20
UBE2D3	-0.264705	4.98743e-20
FAM120C	-0.471656	5.03926e-20
TMCO4	-0.656381	5.25328e-20
USP47	-0.417476	5.73933e-20
DDOST	0.3356	5.87228e-20
CAD	0.291865	6.88911e-20
PTOV1	0.307652	6.952e-20
CYP11A1	2.03483	8.87524e-20
RPN1	0.395697	8.87524e-20
C17orf76-AS1	0.206945	1.12801e-19
EPB41L5	-0.602692	1.68902e-19
ROGDI	0.472821	1.7401e-19
CORO2A	-0.47215	1.82254e-19
RPL13A	0.298392	2.05973e-19
RHBDF1	-0.915315	2.10531e-19
PCNXL2	-0.678742	2.36388e-19
FZD6	-0.553579	2.7304e-19
AHSG	4.2361	2.83892e-19
NCKAP5L	1.21042	2.86217e-19
NDRG3	-0.472272	2.99496e-19
ADAM15	0.288419	3.74194e-19
DAG1	0.263878	3.77398e-19
CHMP7	-0.392462	4.169e-19
SLC27A4	0.432786	4.32185e-19
ELF1	-0.896517	6.54844e-19
CTNNA1	-0.330721	7.13988e-19
ITM2C	0.718333	7.15938e-19
UBN2	-0.550243	7.91746e-19
PDIA5	0.496452	8.70086e-19
PDK3	-0.425744	8.70086e-19
C1orf233	0.438821	8.80936e-19
CAMK2B	0.914134	1.00051e-18
GSTO1	0.510905	1.00262e-18
SELM	0.560074	1.05202e-18
CLTC	-0.34111	1.0765e-18
CHST10	0.769246	1.21735e-18
MRPL14	-0.546208	1.48148e-18
AP2A2	-0.451644	1.96001e-18
TMEM59L	1.16547	1.97115e-18
USP54	-0.454195	2.37676e-18
SGPL1	-0.513792	2.49821e-18
MIOS	-0.594786	2.51206e-18
C5orf43	0.918207	2.68849e-18
PDIA3	0.317658	2.7165e-18
SLC1A4	0.797123	3.72848e-18
MT1G	0.563662	4.62882e-18
RC3H2	-0.500264	5.30223e-18
FBXO2	1.44876	5.35218e-18
SLC22A10	1.49754	6.53085e-18
SCARB2	-0.613196	6.61506e-18
STX12	-0.426959	8.55826e-18
GSTA4	-0.55661	8.64193e-18
RTN4	-0.589523	9.76762e-18
GPD2	-0.575174	9.91438e-18
ELF5	-3.45097	1.00382e-17
CARHSP1	0.541617	1.0116e-17
HEATR1	0.400111	1.18223e-17
NUP54	-0.499709	1.30542e-17
HIST2H2BE	0.500258	1.58377e-17
PRKCD	-0.663808	1.88174e-17
SLC22A1	0.750036	2.23707e-17
TNFRSF21	0.619001	2.28978e-17
WNK2	0.507403	2.63847e-17
H2AFY	-0.225954	2.80206e-17
ZC3HAV1	-0.456944	2.80813e-17
FOXN3	-0.450458	4.40705e-17
FOXO3	-0.326245	4.83626e-17
RBL2	-0.445838	5.82694e-17
BNIP3L	-0.345132	5.90082e-17
HMGCS1	-0.629538	5.93942e-17
RAB8B	-0.723624	5.98154e-17
UBE2I	-0.281976	7.20132e-17
PIGA	-0.716556	7.29899e-17
SNTA1	0.48631	8.57634e-17
CA12	-0.528326	8.73329e-17
VKORC1	0.454115	8.73329e-17
PPFIBP2	0.406262	1.00494e-16
AIDA	-0.696143	1.14612e-16
NUBP2	0.424966	1.14829e-16
C14orf132	0.693532	1.3148e-16
ERBB2	-0.340813	1.46249e-16
RNF168	-0.414867	1.48798e-16
CDS2	0.553254	1.49868e-16
ZKSCAN1	-0.330709	1.7166e-16
ERC1	0.592257	1.8328e-16
JUP	-0.278997	1.84468e-16
KRT19	-3.68637	1.84468e-16
FKBP1A	0.286584	1.95927e-16
NT5C2	-0.456765	2.10473e-16
KIAA0930	-0.389963	2.21222e-16
GAMT	0.377467	2.26441e-16
PHF15	0.58519	2.34082e-16
DHTKD1	-0.580068	2.51225e-16
CDC14A	-0.86778	2.54888e-16
MT1F	1.3578	3.01343e-16
TMEM167B	-0.523058	3.01343e-16
GDPD1	-1.26467	3.5067e-16
CTSH	-0.487207	3.52944e-16
KCTD2	-0.548341	3.54522e-16
SLC22A17	1.41749	3.56013e-16
ST13	0.60863	3.71692e-16
ACACA	-0.237876	4.00142e-16
NOS3	-2.68285	4.48499e-16
HACL1	-0.48476	4.51621e-16
EPHB3	-0.750798	4.75852e-16
BTG3	-0.475167	4.82405e-16
MRPL50	0.576503	5.85912e-16
ANP32E	0.709818	6.44136e-16
LOC100506795	-2.74645	6.48036e-16
GNPTAB	-0.660126	6.49845e-16
FAM171A1	0.468015	6.50332e-16
ENAH	-0.476146	6.92982e-16
CRAT	0.406598	7.50565e-16
ZNF75D	-0.634282	7.60565e-16
ASAH1	-0.445602	7.71392e-16
PGRMC1	0.404089	7.71392e-16
SNHG3	-0.254853	7.73916e-16
MBNL3	-0.796263	8.98633e-16
HMGCS2	-0.993774	1.0198e-15
TRIB3	-0.346818	1.1034e-15
PABPC4	0.530339	1.21873e-15
ABL1	0.328092	1.36746e-15
SLC38A10	0.326704	1.53422e-15
KCNMA1	0.341051	1.61128e-15
GNPAT	-0.499404	1.66555e-15
SESN3	-0.818626	1.67628e-15
KIAA0317	-0.31838	1.72508e-15
ESCO2	-0.498624	1.78576e-15
R3HDM2	-0.431629	2.02767e-15
TRIM68	-0.537512	2.03761e-15
GPR63	0.694514	2.07126e-15
C16orf13	0.382862	2.18477e-15
PDIA6	0.304595	2.36162e-15
DNASE2B	0.828351	2.48655e-15
TRIM47	0.697711	2.61576e-15
ITGB5	0.440961	2.65265e-15
BRWD1	-0.407709	3.6697e-15
HIST1H2AC	0.908823	3.71087e-15
AGRN	0.558602	3.72328e-15
RPL36AL	0.26969	3.77253e-15
YTHDF3	-0.484824	4.29605e-15
ATP1A1	0.428145	4.46041e-15
EGFL7	0.759731	4.54427e-15
MTMR1	-0.583115	4.81128e-15
PSME4	-0.451866	5.18673e-15
FAM129B	-0.425639	5.22808e-15
ERGIC3	0.226745	5.39036e-15
DNAJC1	0.463833	6.03715e-15
ELF3	-0.989717	6.03715e-15
PROCR	1.60521	6.15022e-15
SUV420H1	-0.396306	6.26656e-15
GRAMD3	-1.23361	6.36578e-15
TXNRD2	-0.438336	6.76665e-15
PLEKHB2	-0.211061	6.79623e-15
EDEM3	-0.517874	7.21939e-15
AFF3	0.619099	7.37182e-15
TMEM184C	0.338926	7.48387e-15
KDM5B	-0.310254	7.66312e-15
KIF1A	0.479302	7.93088e-15
CTBP1	0.416871	8.00488e-15
ISYNA1	1.05843	8.03512e-15
GGT1	-1.17875	8.71195e-15
MAFB	-0.593199	9.15442e-15
GNB1	0.195596	9.50904e-15
BANK1	-1.05751	9.73672e-15
MAST4	0.475606	1.0481e-14
YWHAQ	-0.257452	1.0695e-14
TMPRSS11E	-3.79661	1.1002e-14
GALNT1	-0.373491	1.19308e-14
KIAA1797	-0.305775	1.21658e-14
CERS4	-0.631115	1.24504e-14
PRR15L	-0.406363	1.33152e-14
PIGH	0.528119	1.38722e-14
FOXM1	0.341442	1.47543e-14
LYRM1	-0.635599	1.52445e-14
SSU72	0.275488	1.57223e-14
ID1	1.03809	1.60733e-14
CHP	-0.341266	1.66359e-14
PMEPA1	0.463162	1.67806e-14
RNF24	-0.950333	1.73519e-14
SEC61A1	0.287384	1.73519e-14
OCRL	0.391189	1.74372e-14
RRAGD	0.501598	1.74372e-14
CPLX1	0.726332	1.77021e-14
RPL22	0.379975	1.91613e-14
HBXIP	-0.343941	1.92271e-14
RNF13	-0.456865	1.95141e-14
AIF1L	-0.400273	2.71532e-14
AIM1	-1.1721	2.77174e-14
YWHAG	0.22192	2.77174e-14
YPEL2	-0.928465	2.78454e-14
PTDSS1	0.384929	3.08279e-14
C17orf96	0.522875	3.11863e-14
CMTM6	-0.437863	3.22255e-14
STXBP5L	0.274288	3.2244e-14
ODAM	-3.62269	3.24069e-14
BCHE	0.51399	3.51523e-14
PLXNB3	-0.681174	3.55518e-14
ZNF629	0.776507	3.77353e-14
CUL5	-0.421964	3.96872e-14
RAD23B	-0.244841	4.02146e-14
TSPAN15	-0.437583	4.11351e-14
ATP8A1	-1.48621	4.15218e-14
SSR4	0.465648	4.22711e-14
SLC7A11	-0.836752	5.13733e-14
HIST1H2BK	0.565594	5.2363e-14
DTNB	-0.510037	5.32427e-14
FXC1	-0.410683	6.20638e-14
ZNF503	0.959194	6.86936e-14
TMEM241	-0.480134	6.95497e-14
RPLP0P2	-1.78413	7.26641e-14
ALB	2.41787	7.58157e-14
CCDC159	-0.794959	7.67809e-14
WDR3	-0.316933	7.847e-14
PPM1H	-0.34836	8.74541e-14
JHDM1D	-0.691844	8.92317e-14
C15orf24	0.396516	1.16984e-13
NIPSNAP1	-0.340638	1.17361e-13
FTSJD1	-0.492723	1.2334e-13
PPIL2	-0.376931	1.2683e-13
KIAA0195	0.414637	1.27893e-13
SV2C	-2.73179	1.29498e-13
C4orf34	-0.843757	1.3103e-13
LSM10	-0.492826	1.47877e-13
ME2	-0.507162	1.5778e-13
RPUSD1	0.443389	1.60828e-13
LIMA1	-0.534993	1.65932e-13
ZNF217	-0.386013	1.65932e-13
KIAA0368	-0.196579	1.6762e-13
SERTAD2	-0.70036	1.82369e-13
NRD1	-0.30291	1.86009e-13
MPZL2	-0.55225	1.94773e-13
AIFM1	-0.233563	2.03711e-13
NEU1	-0.447338	2.05629e-13
DNAJC13	-0.285972	2.23749e-13
ARMCX4	1.00211	2.40995e-13
C6orf211	-0.675947	2.55421e-13
NAT1	-0.670047	2.55549e-13
FAM168B	-0.216406	2.64432e-13
HINT3	-0.721405	2.78054e-13
ATP11B	-0.541537	2.91684e-13
ALDH9A1	-0.346787	3.18077e-13
MOCS1	0.544335	3.41739e-13
NCS1	0.34657	3.74811e-13
CDK4	0.277036	3.80064e-13
SLC16A2	0.865757	3.88693e-13
CUTA	0.469047	4.05407e-13
PIGN	-0.410661	4.08729e-13
IPO4	0.322033	4.27882e-13
SLC39A1	0.329412	4.34529e-13
MDC1	-0.274346	4.37318e-13
PPL	-0.921326	4.37741e-13
ADAM10	-0.413872	4.64884e-13
LRRC59	0.214271	4.64884e-13
PLOD3	0.58477	4.71449e-13
PTBP3	-0.344947	4.79e-13
MOCOS	-0.491617	4.88312e-13
PHLDB1	0.597501	5.41739e-13
MSMO1	-0.566435	5.4933e-13
ADH1C	1.24276	5.88373e-13
HK1	0.273103	5.94662e-13
CA11	1.15344	6.349e-13
LRRC61	0.764994	6.64707e-13
PTDSS2	0.495061	6.75407e-13
GPR56	-0.652758	6.78215e-13
CADM4	0.774845	6.82149e-13
RSC1A1	-0.845892	6.94824e-13
NEO1	0.647804	7.11583e-13
NRM	0.670927	7.52223e-13
GATAD2A	-0.291015	7.53927e-13
C2orf72	0.80755	7.60971e-13
LIMCH1	-0.287454	7.70979e-13
ANXA4	-0.449382	8.1149e-13
F12	0.905655	8.19512e-13
MLPH	-0.444702	8.19512e-13
TMEM164	-0.435022	8.45804e-13
SH3BGRL	0.370883	8.90731e-13
TCP1	0.289982	8.98281e-13
LEPROT	-0.685035	9.13731e-13
RIC8A	-0.436872	1.01029e-12
GPNMB	-1.61401	1.04965e-12
RNF11	-0.38885	1.15959e-12
GLIS2	0.682965	1.19895e-12
SDCBP	0.363969	1.26786e-12
ABCC5	-0.382606	1.31384e-12
TMOD3	-0.550451	1.34542e-12
MEAF6	-0.472962	1.36455e-12
CHPF2	0.443535	1.38156e-12
LACTB	-0.439016	1.40296e-12
LRPAP1	0.327166	1.43268e-12
SEPW1	0.565294	1.49334e-12
PPP2R4	-0.201461	1.49965e-12
GRIN3A	-1.29067	1.6078e-12
PRKAG2	-0.670636	1.61027e-12
PCDH1	-0.909373	1.62058e-12
PELI2	0.818879	1.62058e-12
FAM69B	0.547638	1.6289e-12
BLCAP	0.368481	1.70562e-12
PPM1A	0.251485	1.73193e-12
SNRPD1	-0.421548	1.76482e-12
TMEM87A	-0.469868	1.97792e-12
AP1B1	-0.207522	2.00665e-12
ACTR3	-0.209898	2.01127e-12
GNPNAT1	0.44712	2.07465e-12
MED1	0.258401	2.27841e-12
SHANK3	0.902245	2.27841e-12
ARRDC4	-0.563273	2.31781e-12
HDDC2	0.313479	2.48362e-12
GMPR2	-0.313273	2.70586e-12
MYO1B	0.329904	2.71802e-12
FKBP2	0.589209	2.78542e-12
VPS37A	-0.472517	2.82573e-12
NBN	-0.475604	2.89448e-12
SAMD11	1.14965	3.00466e-12
ENO1	0.266205	3.31073e-12
PHGDH	0.255556	3.42956e-12
PRDX6	0.125296	3.42956e-12
PIGT	0.547619	3.52226e-12
PER3	0.461078	3.58048e-12
KCNH2	1.2166	3.6249e-12
TMEM159	-0.703942	3.78663e-12
RPL4	0.196434	3.82288e-12
GPRC5C	0.845143	3.9922e-12
USO1	-0.385791	3.99394e-12
TUBA4A	0.364691	4.04228e-12
KIAA1033	-0.593049	4.19577e-12
IKBIP	0.903037	4.29436e-12
SLCO4A1	0.509538	4.40818e-12
LAPTM4B	0.724367	4.52373e-12
LIMK2	-0.327173	4.59292e-12
PRDX4	0.345001	4.59292e-12
ZIC2	0.479886	4.73429e-12
NAPRT1	0.526745	4.82796e-12
TMUB1	0.38995	5.18254e-12
MAPRE2	0.621098	5.2905e-12
GOLGB1	-0.254799	5.42932e-12
SH3RF1	-0.303029	5.43206e-12
SIX5	0.761382	5.69916e-12
TFAP2A	-1.03209	5.8886e-12
WDR34	0.348719	6.33357e-12
CHD3	0.337496	6.42297e-12
CACNB3	-0.593535	6.69504e-12
NKX3-1	-0.239251	6.76149e-12
HYOU1	0.2546	6.97037e-12
LONRF1	-0.527959	6.97037e-12
MYL12B	-0.239653	7.43275e-12
TNK2	0.591904	7.54814e-12
GSTM3	0.357495	7.65292e-12
SAMD13	0.602587	7.95965e-12
ZNF295	-0.40939	8.02416e-12
PDIA3P	0.303199	8.63979e-12
PYCR1	0.241691	8.7927e-12
SUPT16H	-0.328286	8.85082e-12
SEC23A	-0.278683	9.65552e-12
MANSC1	-0.559206	1.01152e-11
SASH1	-0.403774	1.05499e-11
RASA1	-0.350149	1.07441e-11
FBXL17	-0.368352	1.11026e-11
LOC100506844	1.5032	1.14965e-11
LPP	-0.26304	1.14965e-11
TMEM45A	2.09561	1.14965e-11
CD46	-0.351606	1.16785e-11
SLC6A9	0.576511	1.18608e-11
SHMT2	0.251403	1.2367e-11
UGT2B17	-0.373306	1.27287e-11
LPP-AS2	-0.638941	1.29982e-11
CAMK2N1	-0.216649	1.41811e-11
GPAA1	0.338669	1.42211e-11
VAT1	0.422861	1.45593e-11
AGPAT2	0.832027	1.47594e-11
TRIM62	-0.610604	1.50932e-11
IQGAP2	-0.371851	1.54601e-11
AACS	0.279768	1.58705e-11
NAGLU	0.445101	1.63116e-11
C2orf28	0.277656	1.63909e-11
CD151	0.519986	1.69096e-11
MRPS11	-0.352965	1.69373e-11
C6orf132	0.580946	1.70558e-11
EIF1B	0.426905	1.73915e-11
TGM3	0.876866	1.7743e-11
SLC39A14	0.426007	1.77935e-11
ID3	0.895663	1.81617e-11
MIA3	-0.340241	1.82066e-11
KBTBD11	0.626564	1.88305e-11
MED20	-0.708872	1.90898e-11
OAZ3	-0.916358	1.94369e-11
NAT8L	0.587952	1.95974e-11
PTPRG	-0.522597	1.99338e-11
THBS1	0.384454	2.01379e-11
ABCC4	0.411704	2.02746e-11
GPR172A	0.36419	2.04497e-11
PRKD1	-0.292122	2.06146e-11
PLA2G7	-2.74635	2.224e-11
MGRN1	0.341633	2.4208e-11
NSF	-0.463163	2.47138e-11
AMFR	0.3425	2.47658e-11
CELSR2	0.569301	2.47658e-11
DLG3	-0.321509	2.5226e-11
RNF103	-0.533904	2.53938e-11
PEBP1	0.174699	2.53976e-11
MGST1	-0.442651	2.61195e-11
DAP	-0.23748	2.65397e-11
H1F0	0.260029	2.78126e-11
SEMA3G	0.690023	2.78126e-11
RAC3	0.596657	2.92041e-11
APBB1	0.759973	3.01304e-11
PDLIM5	-0.495103	3.03733e-11
VARS2	0.261753	3.05775e-11
PNMA1	0.452982	3.08115e-11
TTC8	-0.346173	3.13906e-11
OSBPL8	-0.648475	3.1636e-11
ARF6	-0.297093	3.2664e-11
E2F1	0.329162	3.26882e-11
ROCK2	0.423938	3.32086e-11
DTX2	-0.560847	3.34224e-11
COL6A1	0.375192	3.54665e-11
FBXL6	0.40143	3.56135e-11
KLF11	-0.621834	3.66454e-11
FEN1	0.303216	3.69033e-11
SBDS	-0.448448	4.05063e-11
RPL15	0.205103	4.21489e-11
ZNF385B	0.452739	4.25423e-11
ZAK	0.379006	4.5166e-11
RHOA	0.244449	4.68128e-11
CHST14	0.514743	5.21483e-11
LCOR	-0.623441	5.55913e-11
P4HA2	0.649963	5.55913e-11
HOXC9	0.899271	5.65018e-11
RASAL2	0.457961	5.68074e-11
ARFGEF1	-0.318217	5.85386e-11
TMEM136	0.569855	6.09586e-11
COASY	0.197833	6.43528e-11
MADD	0.345885	6.52596e-11
TTYH3	0.45652	6.69873e-11
CLCN3	-0.36853	6.95082e-11
NAA50	0.408375	7.11994e-11
SYNGR3	1.76291	7.13728e-11
PASK	0.39108	7.20385e-11
PLOD1	0.329769	7.20385e-11
SPTLC3	-0.639088	7.20385e-11
MKRN1	-0.519185	7.21506e-11
C3orf39	0.387018	7.44083e-11
RPS7	0.253656	7.482e-11
TTC21B	-0.35103	7.59185e-11
UBQLN4	-0.317713	7.59185e-11
TRERF1	-0.488086	7.74716e-11
ALOXE3	0.77611	8.15511e-11
KIAA1468	-0.442832	8.23008e-11
ZDHHC24	0.646977	8.367e-11
TMEM192	-0.452779	8.62821e-11
IFRD2	0.404309	8.84205e-11
STYXL1	-0.450892	8.99384e-11
TUBA1B	0.207885	9.11015e-11
BBX	0.222027	9.22802e-11
PI4K2B	-0.488541	9.54812e-11
LDLR	-0.321299	9.88394e-11
STARD10	-0.578397	1.03152e-10
DGAT1	0.452993	1.04505e-10
BAG1	0.310987	1.04751e-10
WARS	0.231869	1.1155e-10
EIF2AK2	0.655559	1.12571e-10
PNMA3	1.03592	1.19589e-10
FRS2	-0.424897	1.28746e-10
TPRA1	0.401005	1.28798e-10
STAT1	0.294462	1.29382e-10
QSER1	0.385966	1.29511e-10
EDARADD	0.326999	1.31596e-10
PAX1	0.848981	1.38686e-10
C16orf70	-0.264267	1.42245e-10
HEG1	0.957078	1.43332e-10
FAM49B	-0.683697	1.49559e-10
NF1	-0.239838	1.61165e-10
NT5DC2	0.258755	1.73871e-10
NGFRAP1	0.296978	1.76499e-10
VIPR1	-0.522702	1.81795e-10
MTMR6	-0.527326	1.85231e-10
BMPR1B	-0.928358	1.88295e-10
SHISA5	-0.349478	1.90063e-10
MTFP1	0.470372	1.94019e-10
LIPH	-1.56953	1.99913e-10
RG9MTD2	-0.625885	2.122e-10
CHCHD6	0.68348	2.13079e-10
OGDHL	0.947824	2.24488e-10
TIMMDC1	-0.212368	2.26364e-10
PEX13	-0.653465	2.2935e-10
GPS1	0.31539	2.34067e-10
MKL2	-0.23691	2.40202e-10
MPZL1	0.223526	2.40333e-10
PRLR	-1.00304	2.42016e-10
HSPA9	-0.398585	2.42166e-10
NMNAT2	0.586138	2.60859e-10
IL17RC	-0.413932	2.6419e-10
PHF20	-0.262549	2.71241e-10
SEL1L	-0.55692	2.75528e-10
PTGR2	-0.402318	2.90781e-10
CLN6	0.325882	2.96292e-10
ESRP2	-0.357366	2.97361e-10
KANK2	0.403693	3.0848e-10
TMEM45B	-0.830333	3.15041e-10
RPN2	0.196977	3.29359e-10
SORD	-0.198897	3.32304e-10
PDSS2	-0.485639	3.61838e-10
MIB1	-0.461987	3.66015e-10
AK4	-0.362203	3.68105e-10
SGCB	0.589681	3.75576e-10
SRPRB	0.296106	3.81223e-10
PRDX2	0.177855	3.88556e-10
CYSTM1	0.505869	3.94716e-10
PTGFRN	0.241018	4.15241e-10
ST3GAL2	0.741398	4.17373e-10
RLN1	0.635625	4.22535e-10
KIF5C	-0.704646	4.25339e-10
FNTA	-0.598055	4.385e-10
UBE2D2	-0.248622	4.41714e-10
REEP4	0.4264	4.45892e-10
GOLIM4	0.441292	4.54214e-10
EIF4EBP1	0.326363	4.68479e-10
STX6	-0.41109	4.86087e-10
CHRNA2	0.380597	4.86406e-10
DOLK	0.395342	4.86406e-10
RAB17	0.473974	5.04101e-10
ZNF697	-0.59832	5.18231e-10
MCFD2	0.354994	5.37087e-10
NOL12	-0.519792	5.45538e-10
SNX27	-0.343044	5.48474e-10
NCOA3	-0.465829	5.49368e-10
SEZ6L2	0.353599	5.62649e-10
ADCY1	0.650448	5.71888e-10
TMEM185B	-0.403821	5.90706e-10
B3GNT1	0.547845	5.95212e-10
CHMP2A	0.339362	5.99303e-10
POLR2E	0.322281	5.99803e-10
HMGA1	0.295311	6.12229e-10
FNBP1	-0.387052	6.13164e-10
PPP1R15B	-0.419753	6.17995e-10
ERGIC2	-0.514613	6.18977e-10
KRCC1	-0.900802	6.19614e-10
FHDC1	0.441522	6.40214e-10
CNPY2	0.254722	6.42858e-10
DIMT1	-0.339506	6.45628e-10
CYLD	0.408567	6.59425e-10
LARP6	0.644482	6.60052e-10
TAOK1	-0.33976	6.63532e-10
MAPK11	0.693003	7.00657e-10
RPL3	0.161515	7.52537e-10
GLI3	1.1067	7.59182e-10
MYD88	-0.722878	7.73521e-10
API5	-0.489772	8.56028e-10
HGSNAT	-0.326881	8.69117e-10
PTPRF	-0.333329	8.78668e-10
LYPLAL1	-0.474078	8.80982e-10
PTPN12	-0.420086	8.81704e-10
REEP6	-0.429861	8.81704e-10
COQ10A	1.03767	8.93687e-10
ZCCHC2	-0.344627	9.08918e-10
COQ7	-0.364958	9.49519e-10
C11orf84	0.413475	9.58414e-10
OMA1	-0.612354	9.89284e-10
CRYM	2.02545	9.94832e-10
BSG	0.30185	1.0199e-09
FOXN1	-3.28455	1.09681e-09
GABRB3	-0.3771	1.10157e-09
EPCAM	0.451378	1.11171e-09
MKNK2	-0.288379	1.11224e-09
PDE8A	0.393048	1.14524e-09
NDUFS2	-0.163234	1.15222e-09
FKBP11	0.466193	1.23976e-09
HMGN1	0.257091	1.2492e-09
PAK2	-0.377056	1.25469e-09
APH1A	0.235564	1.25553e-09
SPTAN1	0.214188	1.3194e-09
ANXA7	-0.235622	1.33764e-09
CCDC74A	0.906605	1.3468e-09
MCCC1	-0.311251	1.35831e-09
HTT	-0.219498	1.37408e-09
ARMCX5	-0.489187	1.41546e-09
C16orf80	0.330503	1.41546e-09
LAMB2	0.366387	1.41546e-09
VPS4B	0.409409	1.42706e-09
SLC1A5	0.423506	1.46348e-09
SUGP2	0.269997	1.54308e-09
CDC42EP3	0.62392	1.5894e-09
NKPD1	-2.13177	1.65352e-09
HRNR	-3.25923	1.69604e-09
EID2B	0.674957	1.737e-09
PRKAR1A	-0.28453	1.7475e-09
SLC35E1	-0.204357	1.7514e-09
DIDO1	0.226566	1.86122e-09
CDC42BPB	-0.297529	1.88502e-09
H2AFJ	-0.488985	1.92396e-09
AQP3	-1.54281	1.98648e-09
PTPN13	0.304903	2.00833e-09
WRB	-0.4381	2.10168e-09
GDF15	0.342863	2.13934e-09
TDRKH	-0.670064	2.21654e-09
DCTN4	-0.280224	2.23527e-09
LRRFIP1	-0.226254	2.3098e-09
HMGB3	0.321585	2.31153e-09
CLTA	-0.22251	2.32539e-09
WWC1	-0.192885	2.37986e-09
BLVRA	0.372199	2.48579e-09
MAN1A1	0.857342	2.52534e-09
MGAT2	0.29475	2.53656e-09
KIAA2018	-0.323872	2.58981e-09
MAP4K5	0.582673	2.63232e-09
NR1D2	-0.527912	2.74479e-09
DSC2	0.443705	2.82607e-09
ZNF358	0.38404	2.92676e-09
RAB5B	-0.311726	3.16773e-09
ASNS	0.246366	3.17694e-09
PPP2R5C	-0.235132	3.22567e-09
MRPS18A	0.313766	3.25303e-09
ODZ1	-1.09121	3.26767e-09
RNF26	0.242495	3.35024e-09
MRFAP1L1	-0.517202	3.37151e-09
DCAKD	-0.424403	3.60046e-09
C10orf81	-2.49571	3.6261e-09
CNOT6	-0.380814	3.69706e-09
PIGM	0.365882	3.73097e-09
RPIA	-0.569065	3.73097e-09
CLIC1	-0.517159	3.7873e-09
DBP	0.57931	3.84506e-09
KCNS3	0.61336	3.88578e-09
HMGN3	0.475528	4.04753e-09
BMP1	0.584829	4.06653e-09
ZCCHC6	-0.429729	4.13209e-09
SKAP2	0.38435	4.34233e-09
UBXN1	0.273467	4.37259e-09
ADAMTS15	1.3042	4.4497e-09
ITGB1	0.328837	4.66688e-09
LTBP3	0.47626	4.70268e-09
ADAM9	-0.367239	4.76431e-09
ANKRD44	-0.724637	4.80383e-09
CSTB	0.367193	4.86555e-09
NPDC1	0.516038	4.88858e-09
TJP1	-0.117452	4.92127e-09
ANKS1A	-0.349386	4.93729e-09
PDE4D	0.566178	5.11102e-09
SMPD4	0.336228	5.18279e-09
SLC22A31	0.809752	5.34356e-09
AP1M1	0.351535	5.41949e-09
WDR54	0.480759	5.47765e-09
UACA	-0.609804	5.49967e-09
LOC90246	-0.871983	5.54016e-09
CAMK2D	-0.836645	5.92674e-09
UGT2B10	-1.15711	6.25164e-09
TRIM46	-1.25302	6.29468e-09
ATP5A1	0.104915	6.35493e-09
MYSM1	-0.391878	6.4548e-09
B4GALT2	0.34955	7.2757e-09
KDM1B	-0.413379	7.2757e-09
PTPMT1	0.31107	7.2804e-09
RICTOR	-0.476014	7.3235e-09
PCMTD1	-0.60851	7.48516e-09
AGTPBP1	-0.365114	7.57603e-09
TOR3A	0.360226	7.6436e-09
KCTD9	-0.631041	8.02878e-09
THAP11	0.486914	8.34556e-09
ATP13A2	0.380087	8.35065e-09
TMEM134	-0.613276	8.42715e-09
SEC13	0.25309	8.46085e-09
IL17RB	0.465349	8.55613e-09
HIST1H2AE	0.921916	8.65273e-09
GANAB	0.23422	8.69466e-09
RNF135	-0.520506	8.7374e-09
RIT1	-0.538021	8.82606e-09
GPRIN2	0.826962	8.8765e-09
UTP18	-0.292093	8.90249e-09
SPNS1	0.341448	9.50081e-09
PRAF2	0.627326	9.56381e-09
CCNJ	-0.591139	9.57352e-09
SSR2	0.32641	9.67326e-09
SIPA1L2	0.288866	9.69501e-09
MYO1D	-0.365899	9.72483e-09
USP16	-0.452417	9.85936e-09
TCF19	0.294219	9.86269e-09
POLR1D	0.225576	1.00617e-08
SPON2	0.350428	1.02029e-08
PPA2	-0.307386	1.0238e-08
OPRK1	0.645343	1.02405e-08
TSR1	-0.331711	1.03867e-08
CTSF	0.705061	1.06762e-08
TRAF7	0.415199	1.07826e-08
FN3K	0.644263	1.09878e-08
TRIM26	-0.372844	1.11377e-08
SUFU	-0.426721	1.11613e-08
NOLC1	-0.244772	1.13825e-08
BIK	-0.941278	1.14141e-08
ZDHHC6	-0.305259	1.16285e-08
FPGT	-0.641264	1.16499e-08
PGM1	0.585141	1.16918e-08
HIST1H2BD	0.605808	1.23941e-08
USP31	-0.251548	1.24355e-08
ACTR10	-0.334339	1.27014e-08
PEMT	0.451723	1.2767e-08
TMCO3	0.2818	1.29947e-08
FOLH1	0.248116	1.30994e-08
C2orf29	-0.358776	1.33958e-08
FANCG	0.282564	1.34711e-08
RASEF	-0.405307	1.39804e-08
GNB2L1	0.240444	1.40609e-08
PCM1	-0.260742	1.40609e-08
TPI1	0.173041	1.40609e-08
PPP4R2	-0.369291	1.42687e-08
RECQL4	0.327381	1.43457e-08
DSP	-0.16435	1.56457e-08
ALPK3	-0.518253	1.59877e-08
CCDC125	-0.398277	1.73413e-08
BARD1	-0.428058	1.77881e-08
HIST1H2AG	1.27353	1.7883e-08
NAA10	0.261311	1.79149e-08
AKT2	0.212389	1.83271e-08
MMADHC	-0.269451	1.87665e-08
EPS15	-0.228087	1.87843e-08
TMTC3	-0.71524	1.92571e-08
HSDL2	-0.550564	2.01338e-08
WARS2	-0.395002	2.03209e-08
STX19	-0.952287	2.1047e-08
CFDP1	0.431353	2.1056e-08
EIF2S2	-0.324911	2.13056e-08
PEX10	-0.223825	2.14021e-08
KEAP1	0.283683	2.16408e-08
USP9Y	-0.323713	2.16422e-08
EGFR	-0.544056	2.20727e-08
BCL7C	0.511772	2.29722e-08
SF3B3	0.197875	2.29722e-08
MIEN1	-0.298462	2.32381e-08
MGMT	0.414534	2.33951e-08
ITPR1	-0.598856	2.40046e-08
PHKB	-0.269093	2.41799e-08
GNPDA1	-0.28904	2.46406e-08
PER2	0.485121	2.69401e-08
OIP5-AS1	0.322425	2.71876e-08
ST3GAL1	0.162731	2.7377e-08
LPAL2	0.554025	2.75548e-08
GTF3C1	0.144324	2.78342e-08
RPL34	0.220281	2.78342e-08
SNAP23	-0.360542	2.7919e-08
METAP1	-0.385825	2.89179e-08
TP53I13	0.649926	2.89179e-08
MMP15	0.347252	2.89729e-08
C11orf80	-0.730649	2.92411e-08
RNASEH2C	0.396209	2.92411e-08
CCDC19	-2.39117	2.96594e-08
EIF2B5	-0.21505	3.00305e-08
SLC19A1	0.429241	3.12188e-08
E2F5	-0.90153	3.24028e-08
C19orf12	0.521944	3.28772e-08
LIG3	-0.234683	3.31345e-08
PRKCSH	0.35005	3.34132e-08
THRA	0.349944	3.36307e-08
SC5DL	-0.510396	3.40764e-08
NDUFS1	-0.266283	3.40855e-08
PTER	-0.556874	3.40855e-08
RDH10	0.531958	3.40855e-08
C1orf198	-0.392312	3.52939e-08
AKAP1	-0.181659	3.54448e-08
LPIN2	-0.285214	3.67103e-08
SETMAR	-0.38607	3.73149e-08
RTN4R	0.714561	3.76728e-08
GNL3L	-0.227778	3.7909e-08
PLDN	-0.328074	3.88805e-08
EID1	0.389955	4.00858e-08
RALB	-0.540051	4.02089e-08
TPD52L1	-0.298061	4.1219e-08
TRAF3	0.279957	4.1219e-08
DIP2B	-0.258716	4.12761e-08
ACSS2	-0.368912	4.25576e-08
PKNOX1	-0.332907	4.33206e-08
DENND5B	0.62022	4.35619e-08
ZBTB47	0.56021	4.4608e-08
NBR1	-0.236885	4.50171e-08
ZC3H12A	-0.605761	4.50171e-08
SNX18	-0.382555	4.63787e-08
HPS5	-0.295629	4.93733e-08
CD276	0.236513	4.9581e-08
TEAD3	-0.58589	4.9581e-08
TUBB2A	0.779477	4.98546e-08
AP2B1	-0.239693	5.03943e-08
SQLE	-0.306442	5.05973e-08
IGIP	0.450043	5.06554e-08
ABHD2	0.227996	5.0663e-08
RBM18	-0.327944	5.27066e-08
TARBP1	-0.361339	5.2722e-08
EIF4G3	-0.215192	5.27755e-08
CHCHD4	-0.361153	5.33479e-08
C17orf39	0.418877	5.34284e-08
KRBA1	0.79773	5.36133e-08
ARNTL	0.616376	5.45201e-08
BTN2A1	-0.596182	5.52427e-08
LPAR3	0.291154	5.53533e-08
C20orf11	-0.228009	5.60572e-08
SLC46A1	0.306414	5.64481e-08
VEZF1	-0.384015	5.72017e-08
PIK3IP1	-1.11531	5.73031e-08
MVK	-0.372058	5.73613e-08
CBX7	0.340884	5.81348e-08
ZNF587	-0.26358	5.98803e-08
PDZD2	-1.47794	6.0649e-08
EIF3E	0.21951	6.19855e-08
BEX1	1.7843	6.40423e-08
MBOAT2	-0.23892	6.50262e-08
YIF1B	0.381333	6.67905e-08
ZNF462	-0.434011	6.77006e-08
ATP6V0E2	-0.289054	6.95267e-08
TBC1D1	0.290495	7.12761e-08
LARS	-0.290912	7.22562e-08
MAF	-0.603318	7.28706e-08
FLJ35776	-1.25502	7.31395e-08
DPH2	0.263394	7.38829e-08
ZNF274	-0.383906	7.51625e-08
CDK13	-0.349442	7.62486e-08
NKIRAS1	-0.649524	7.62486e-08
GALK1	0.497095	7.73734e-08
DPCD	0.386612	7.76275e-08
CCDC90A	-0.356301	7.78626e-08
TBC1D9	-0.287449	7.83816e-08
AGR2	-1.43373	7.98361e-08
ARHGEF25	1.15107	8.06838e-08
FNDC3A	-0.570991	8.0765e-08
NCKAP1	-0.270376	8.44522e-08
SORT1	0.613306	8.45748e-08
MSMB	-2.78708	8.53205e-08
CLDN3	0.554328	8.77026e-08
G3BP2	-0.232573	8.77824e-08
LRBA	-0.203392	8.78234e-08
TMEFF2	0.277295	8.91101e-08
ACTA2	0.827559	8.92231e-08
DENND4C	-0.394348	8.97758e-08
STRN	-0.575607	9.21712e-08
MAPK9	-0.283759	9.24665e-08
MCOLN1	0.467458	9.26657e-08
RORC	-0.416803	9.3101e-08
RNPEP	0.20854	9.42904e-08
NT5C	0.551625	9.46418e-08
SENP5	-0.238852	9.66341e-08
CDC25B	0.233028	9.76583e-08
ARHGEF17	0.426278	9.99754e-08
WFS1	0.309719	1.00006e-07
KIAA1024	-0.999915	1.03007e-07
CDH24	0.725584	1.05114e-07
ZMYND11	-0.333204	1.0548e-07
PKIG	0.624054	1.05556e-07
SLC6A11	-0.582242	1.10424e-07
ZNF281	0.47206	1.11423e-07
TECR	0.313301	1.12136e-07
TBC1D5	-0.252082	1.18795e-07
MAPKAPK5	-0.450906	1.21255e-07
CCDC50	0.311459	1.22941e-07
ALDH16A1	0.4262	1.2371e-07
PHF17	0.35558	1.2875e-07
SON	-0.12909	1.29971e-07
ACOT7	0.329511	1.3082e-07
PLA2G4E	-2.43537	1.31402e-07
UBR7	0.24915	1.33838e-07
39142	-0.355758	1.35024e-07
KPNA3	0.336003	1.37784e-07
ITPR3	0.434631	1.39323e-07
RNF141	-0.353381	1.40403e-07
CRYL1	-0.368555	1.40661e-07
ATL3	-0.364074	1.43384e-07
FGFR1	0.821662	1.43384e-07
ANTXR1	0.899879	1.50117e-07
PDCD4	-0.246947	1.51333e-07
FAM49A	-1.4202	1.51593e-07
C16orf5	0.23996	1.5447e-07
TDP2	-0.458407	1.55959e-07
TRIP12	-0.188078	1.61928e-07
TMEM135	-0.32311	1.66488e-07
ZNF219	0.626052	1.67121e-07
ANXA5	0.277302	1.68967e-07
ZNF737	-0.552353	1.78399e-07
ZNF324	0.463127	1.82014e-07
C6orf62	-0.314897	1.85197e-07
MYO5A	-0.26894	1.94032e-07
KCNG1	-1.08007	1.97162e-07
TBX3	0.25335	1.98188e-07
SEC11A	0.327349	1.9898e-07
TMEM125	0.321764	2.01123e-07
ELOVL6	-0.530355	2.0337e-07
ANKRD13B	0.408588	2.07176e-07
SSH3	-0.614596	2.07872e-07
CANX	0.322807	2.11872e-07
SDC3	-0.405747	2.11872e-07
CRIM1	0.720113	2.15485e-07
APP	0.323463	2.15769e-07
GOLGA4	-0.412226	2.20478e-07
TRIM33	-0.362734	2.21095e-07
GLA	0.405204	2.23918e-07
PRKDC	-0.120464	2.24795e-07
LONP2	-0.240757	2.26408e-07
TNKS2	-0.461295	2.26817e-07
HNRNPUL2	-0.354228	2.3201e-07
PXDN	0.840488	2.34482e-07
LOC344595	0.572773	2.36482e-07
TOB1	-0.288833	2.38778e-07
TDP1	-0.258141	2.40315e-07
KDELC1	0.683208	2.41382e-07
MTHFD1L	0.291815	2.44949e-07
ZHX3	-0.229332	2.45857e-07
SLC2A12	-0.597898	2.46636e-07
PKNOX2	0.62236	2.47545e-07
GNL1	0.319022	2.49517e-07
RB1CC1	-0.433441	2.52649e-07
CCDC106	0.388866	2.55984e-07
MTIF3	-0.362186	2.59827e-07
ASNA1	0.283683	2.60936e-07
PFDN5	0.204462	2.63922e-07
RGMB	-0.384282	2.63922e-07
ARHGAP5	0.486036	2.67299e-07
C19orf48	0.19016	2.67299e-07
MEX3A	-0.448613	2.70107e-07
SERPINB5	0.689607	2.70601e-07
TOX3	0.471557	2.80103e-07
MRPS35	-0.333997	2.81494e-07
HRSP12	-0.482068	2.82033e-07
LIX1L	1.6363	2.83756e-07
C16orf48	0.604551	2.84044e-07
THAP4	0.236262	2.89249e-07
TXNDC15	0.401615	2.90057e-07
RRM2	-0.245779	2.9032e-07
SOX13	0.428323	2.92895e-07
EPN1	0.233034	2.93829e-07
TMC4	0.358999	2.95344e-07
NR1H3	-0.513536	3.02377e-07
PSENEN	0.357348	3.03079e-07
ZBBX	0.75991	3.08327e-07
ADM2	0.347183	3.12825e-07
KLHL24	-0.646029	3.24273e-07
PAK4	-0.349787	3.29836e-07
OSBPL11	-0.343812	3.36867e-07
USP11	0.542058	3.3862e-07
OXR1	-0.643369	3.38853e-07
SMARCD2	-0.236687	3.40014e-07
B9D1	0.924247	3.43358e-07
SCMH1	-0.238528	3.48131e-07
MCM3	0.246109	3.48877e-07
ZNF460	-0.597042	3.48877e-07
CITED2	0.336317	3.50219e-07
CALCOCO2	-0.253433	3.5969e-07
PIGS	-0.295225	3.59939e-07
C2orf18	0.353768	3.6173e-07
TSPAN1	-0.583987	3.71783e-07
DCUN1D1	-0.444519	3.72172e-07
PPP6C	-0.217291	3.7977e-07
CHTF8	0.211408	3.81653e-07
ARF4	-0.191417	3.82475e-07
ITPKC	-0.445311	3.82794e-07
CMAS	-0.288634	3.96961e-07
ALG3	0.293715	3.99633e-07
NDN	0.333805	4.03803e-07
PIGO	0.266107	4.10467e-07
CDC42BPG	-0.463425	4.16962e-07
JAKMIP1	-0.982298	4.17571e-07
RNASE4	1.4428	4.22807e-07
MRPL27	0.326759	4.24528e-07
TMEM14C	0.313416	4.28954e-07
ARHGAP19	-0.299729	4.29706e-07
SGSM3	-0.336205	4.3326e-07
PERP	-0.267599	4.33875e-07
SEPHS2	-0.232777	4.37855e-07
C9orf78	0.2944	4.48623e-07
C7orf29	0.607535	4.54958e-07
RNF6	-0.319405	4.66572e-07
LRRC20	0.261018	4.83021e-07
VPS41	-0.366848	4.86366e-07
C12orf10	0.354206	4.89506e-07
TBCD	-0.209056	4.9441e-07
TNFSF15	-0.611045	5.02932e-07
MFN1	-0.362174	5.04032e-07
SLC48A1	0.45166	5.05395e-07
DCAF10	-0.34211	5.07857e-07
ETNK2	1.45251	5.09206e-07
C17orf79	-0.30405	5.18748e-07
ANKH	0.182133	5.19469e-07
EEF1A1	0.158228	5.212e-07
NHLRC2	-0.492668	5.25115e-07
ERI1	-0.446411	5.42423e-07
MPHOSPH6	0.424114	5.48282e-07
UBE2D1	-0.60964	5.58044e-07
KIAA1804	-0.535997	5.70543e-07
UGT2B11	-0.456127	5.71943e-07
TRMT1	0.283665	5.72946e-07
TUBB4B	0.213614	5.75183e-07
RNF7	-0.323594	6.09593e-07
RAP1A	-0.275933	6.11506e-07
MAP3K2	-0.369442	6.25045e-07
EIF4G1	-0.156852	6.29098e-07
SUPT6H	-0.18723	6.30013e-07
SURF1	0.256653	6.38336e-07
ARL6IP4	0.237861	6.41509e-07
PNPLA6	0.275841	6.44323e-07
UBXN2B	0.310865	6.44323e-07
SCARF2	0.464198	6.4778e-07
UBE4A	-0.332556	6.51519e-07
POLD1	0.340428	6.6486e-07
GSTZ1	-0.455656	6.68395e-07
EIF3K	0.19555	6.7202e-07
SERPINI1	0.61879	6.7412e-07
PTTG1IP	0.229402	6.91708e-07
MINPP1	0.575169	7.09108e-07
PALMD	-1.07148	7.13958e-07
FBXO45	-0.366761	7.20302e-07
ITGA3	1.01695	7.21802e-07
MYBBP1A	0.292169	7.23407e-07
PEPD	0.377422	7.33621e-07
NUMA1	-0.219294	7.42278e-07
DDX10	-0.364908	7.45789e-07
LOC550643	0.416074	7.46304e-07
KIAA1549	0.285633	7.52687e-07
IPO8	-0.274479	7.53246e-07
FAT1	0.325505	7.60108e-07
NRSN2	0.327845	7.61931e-07
PPM1K	-0.466864	7.74226e-07
EEF1A2	0.28752	7.83902e-07
OR2B6	1.01255	7.9617e-07
TRAF3IP2	-0.482466	8.05e-07
GLB1L	0.62391	8.26361e-07
FAM84B	-0.188814	8.30478e-07
CS	-0.24328	8.43819e-07
FAM134B	0.488552	8.64239e-07
FARP1	-0.543694	8.75571e-07
GSK3B	-0.250289	8.88148e-07
KLK2	-0.322565	8.90741e-07
EPHB4	0.402216	9.0045e-07
HMMR	-0.461466	9.06538e-07
RNF167	0.318303	9.07231e-07
PAR5	-0.706806	9.22431e-07
PER1	0.47382	9.29929e-07
GULP1	-0.358027	9.34046e-07
THNSL1	-0.2917	9.36489e-07
HOMEZ	-0.552109	9.45826e-07
SDC1	0.329226	9.45826e-07
SIKE1	-0.313012	9.45826e-07
NEDD9	-1.3329	9.54696e-07
COMMD8	-0.475701	9.55896e-07
ICT1	-0.303426	9.60714e-07
PARP3	0.508592	9.60714e-07
ATF3	-0.408915	9.67889e-07
TXNDC16	-0.393715	9.68767e-07
SLC10A7	0.526469	9.69878e-07
MPP5	-0.372925	9.90913e-07
KDM2A	-0.254255	9.96973e-07
SLC25A23	0.273155	1.00963e-06
NCLN	0.234266	1.02694e-06
OPLAH	0.485955	1.02973e-06
YIPF5	0.294076	1.03273e-06
KDM5D	-0.255482	1.04434e-06
YEATS2	0.228874	1.06548e-06
ACSM3	-0.509661	1.08514e-06
SLC9A3R1	-0.46879	1.08711e-06
HMGN2P46	-0.536561	1.10419e-06
AUH	-0.370082	1.1437e-06
IRGQ	-0.35076	1.14966e-06
PEG10	1.31303	1.15915e-06
ST3GAL4	0.471847	1.16422e-06
MME	-0.180615	1.16894e-06
CDIPT	0.461232	1.1733e-06
C14orf133	-0.458369	1.18425e-06
ATP8B1	-0.441097	1.1856e-06
ZNF433	-0.630585	1.19031e-06
LPHN1	0.206048	1.20624e-06
ZBTB10	-0.387727	1.22093e-06
SPOCK1	1.39345	1.23923e-06
KLF5	0.661563	1.26756e-06
C9orf41	-0.47564	1.31764e-06
GLDC	0.655913	1.35715e-06
LDOC1	0.231592	1.35908e-06
MFSD12	0.325806	1.36654e-06
MRPL42	-0.296595	1.36654e-06
TM9SF1	0.352467	1.38041e-06
POM121	0.313161	1.4076e-06
SECISBP2	-0.38215	1.41789e-06
HOMER1	-0.439591	1.42821e-06
BNIP3	-0.373622	1.43339e-06
HSPA5	0.190273	1.43339e-06
H2AFV	0.255474	1.44292e-06
SERPIND1	-1.0131	1.44292e-06
EIF3F	0.254412	1.4632e-06
MBNL1	-0.216862	1.4632e-06
TTC28	0.729849	1.4732e-06
NLGN2	0.635249	1.49569e-06
MDM4	-0.272461	1.50714e-06
KLKP1	-0.772749	1.51058e-06
UBE3C	-0.191942	1.51232e-06
KCTD20	-0.218224	1.51325e-06
ANLN	-0.450152	1.5284e-06
KLHL12	-0.32916	1.53104e-06
FUBP1	-0.254578	1.53854e-06
CXorf38	-0.589787	1.57978e-06
ENO3	0.489286	1.57978e-06
HECTD2	0.546665	1.57978e-06
KIAA1430	-0.471844	1.57978e-06
SAMD1	0.498197	1.57978e-06
GPX8	0.739651	1.58481e-06
TRIP11	-0.265915	1.58721e-06
CDK2AP1	0.205744	1.58926e-06
C22orf39	0.284939	1.62213e-06
SH3BP4	-0.311718	1.62713e-06
TRDN	-1.38364	1.62735e-06
COMMD10	-0.45579	1.63692e-06
HARS2	-0.277732	1.64697e-06
ST6GALNAC4	0.5371	1.64862e-06
KLF13	0.55474	1.68013e-06
SFXN4	-0.256444	1.68013e-06
ARPP19	-0.25048	1.7141e-06
STT3A	0.237433	1.72307e-06
EFHC1	0.488555	1.73965e-06
HOXB9	0.991274	1.82342e-06
BEX2	0.549815	1.83504e-06
C16orf57	0.341857	1.8478e-06
ARHGAP29	-0.436075	1.85188e-06
LRIG1	-0.24939	1.87788e-06
PPIL4	-0.528	1.87788e-06
PTPN21	0.718385	1.90854e-06
SECISBP2L	-0.403339	1.90854e-06
DLAT	-0.252544	1.91153e-06
MAP7	-0.231512	1.93522e-06
NDFIP1	0.312252	2.08518e-06
CLGN	-0.405872	2.10767e-06
YWHAH	0.264197	2.12717e-06
BCL2L1	-0.240366	2.14563e-06
SLX4	0.270729	2.14737e-06
KLHDC3	0.231111	2.15723e-06
FADS2	-0.212313	2.1626e-06
SAC3D1	0.390636	2.1626e-06
CBX4	0.228992	2.17577e-06
RPL27A	0.230159	2.19788e-06
ANKRD5	-0.289672	2.256e-06
HIST1H2BJ	1.39813	2.256e-06
GADD45G	-0.6245	2.31112e-06
SETD5	0.185154	2.42281e-06
REEP5	-0.38101	2.43101e-06
ZBTB4	0.336532	2.4672e-06
LEPREL4	0.28799	2.53906e-06
RLIM	-0.171747	2.54078e-06
NGRN	-0.232794	2.5759e-06
KLF16	0.364649	2.60786e-06
DNASE2	0.339881	2.60999e-06
TTC35	-0.320954	2.6355e-06
MGC2752	0.231666	2.63902e-06
CETN3	-0.455909	2.65023e-06
SIGMAR1	0.28005	2.68478e-06
PSMD1	-0.189434	2.71372e-06
LRFN4	0.348625	2.74495e-06
RALYL	-0.548243	2.75524e-06
RPF2	-0.357226	2.78425e-06
SYNGR2	0.245264	2.78624e-06
TMEM147	0.237786	2.82183e-06
SRSF8	-0.255071	2.8383e-06
PPIB	0.431618	2.84425e-06
ZDHHC4	0.283423	2.87726e-06
PSMB5	0.152683	2.8842e-06
UBL7	0.328473	2.88962e-06
USP2	0.516084	2.89162e-06
CCDC74B	0.569388	2.92162e-06
AKR1A1	0.161548	2.93253e-06
GTF2E2	0.292373	2.94849e-06
PPP1R3D	-0.458151	2.96186e-06
HM13	0.307158	2.97169e-06
CENPO	0.328427	2.97254e-06
PDXDC1	-0.19105	3.00161e-06
TESC	0.882868	3.00161e-06
MIR600HG	0.476476	3.01795e-06
SLK	-0.34511	3.01795e-06
YIF1A	0.224523	3.14058e-06
LOC150776	0.433659	3.14843e-06
PITPNM1	0.49469	3.14843e-06
AMIGO1	0.744043	3.25485e-06
PIKFYVE	-0.314156	3.25745e-06
C10orf118	-0.513454	3.29976e-06
SSR1	0.282993	3.33396e-06
SLC25A25	-0.244296	3.33828e-06
XPNPEP3	-0.339847	3.41941e-06
NUDT16P1	-0.426312	3.44215e-06
PATL1	-0.414319	3.49498e-06
HIST1H3H	0.894209	3.58999e-06
CAST	-0.256462	3.60707e-06
SLC12A2	-0.459125	3.62768e-06
SLC35B1	0.287369	3.65024e-06
SLC6A8	0.25598	3.68433e-06
ADI1	-0.329201	3.72363e-06
EGF	-0.610044	3.82902e-06
HES6	0.449674	3.82902e-06
SPCS1	0.148302	3.91759e-06
TAF1	-0.408061	3.91927e-06
SUCLG2	-0.280827	3.92814e-06
SETD7	0.130057	3.93329e-06
RAB11FIP4	-0.252955	4.03471e-06
ARHGEF2	0.565325	4.09714e-06
MARVELD2	-0.373104	4.124e-06
PKP4	-0.209006	4.12651e-06
PGLYRP2	-2.3774	4.1368e-06
UBE2W	-0.417644	4.16766e-06
CKAP4	0.29352	4.19741e-06
ATG9A	0.273612	4.19841e-06
MAPK12	0.446964	4.32034e-06
MPP2	0.214238	4.34335e-06
INTS2	-0.339036	4.40711e-06
PRRC1	-0.258427	4.40711e-06
PLXNA1	0.289403	4.40944e-06
CISD3	0.19677	4.43269e-06
MAPK8IP2	0.703872	4.48816e-06
C7orf41	0.744573	4.49511e-06
WDR44	-0.313324	4.5258e-06
ATN1	0.213019	4.5438e-06
KCNQ1OT1	-0.40186	4.56577e-06
BOD1L	-0.288409	4.63407e-06
B3GAT3	0.267172	4.66837e-06
FAM57A	0.312501	4.67027e-06
UBB	0.222914	4.67027e-06
FAM65A	0.239293	4.69083e-06
RREB1	-0.241168	4.69083e-06
DDX59	-0.46798	4.69899e-06
FAM111A	-0.338205	4.74014e-06
ANKRD28	-0.349535	4.75608e-06
HIC2	0.656108	4.77844e-06
SDC2	0.862022	4.78828e-06
ZNF770	-0.243561	4.78828e-06
ZNF789	-0.504985	4.89452e-06
ENOPH1	-0.229984	4.90217e-06
WASF3	0.429667	4.90217e-06
C14orf21	0.253868	4.94103e-06
NETO1	-0.303844	5.05402e-06
TSC22D1	-0.246859	5.15934e-06
EIF3G	0.191225	5.1674e-06
GLS2	0.297364	5.16843e-06
GCAT	0.273632	5.18332e-06
RAP1GAP2	-0.219813	5.24934e-06
EML1	0.389306	5.30209e-06
PAFAH1B3	0.324238	5.30209e-06
ABCG1	0.522458	5.52335e-06
ATF5	-0.270292	5.54048e-06
CYP51A1	-0.302999	5.54048e-06
C9orf142	0.374079	5.65e-06
ACBD4	0.691305	5.6767e-06
EFNB3	0.922745	5.6767e-06
ENOX1	0.685226	5.6767e-06
SLC22A3	0.310221	5.7663e-06
GPR125	0.199929	5.78275e-06
EDN2	1.22118	5.87681e-06
FAM213B	0.274336	6.026e-06
RNF157	-0.379672	6.06276e-06
SLC26A2	0.548594	6.06276e-06
CAPN13	-0.449939	6.13991e-06
GCFC1	-0.289649	6.18332e-06
MAST2	0.224426	6.22663e-06
MLLT4	-0.320796	6.3255e-06
MAN2B2	0.390519	6.33142e-06
VPRBP	0.230893	6.38399e-06
CHCHD3	0.385008	6.40159e-06
CABLES2	-0.310251	6.42374e-06
DNAJA2	-0.212343	6.43888e-06
GPSM1	0.35081	6.53295e-06
POMT1	0.315847	6.57002e-06
POLR2L	0.33486	6.58696e-06
TECPR2	0.690089	6.63007e-06
RCOR1	-0.245047	6.71518e-06
CDC42SE2	0.304832	6.725e-06
CCDC28B	0.584722	6.73876e-06
FAM13A	-0.254904	6.76034e-06
CEP41	-0.454793	6.77225e-06
NDUFA8	0.252244	6.77679e-06
AP1G1	-0.20228	6.82121e-06
PVRL2	0.357126	7.03767e-06
UBXN4	-0.296723	7.06653e-06
FAM105B	-0.283111	7.09797e-06
SMARCAD1	-0.303748	7.13236e-06
RPL10A	0.139735	7.31095e-06
ALG1	0.477856	7.33207e-06
POP1	-0.290132	7.38637e-06
MXD3	0.582798	7.39457e-06
DHRS13	0.485697	7.42511e-06
SMG5	0.186087	7.548e-06
SMCHD1	-0.254091	7.56147e-06
PDCD5	-0.270675	7.57896e-06
C3orf18	0.417621	7.59919e-06
DDX18	-0.201063	7.65467e-06
C9orf72	-0.330935	7.78121e-06
SEC22C	-0.197119	7.91082e-06
GUCY1A3	-0.310103	7.92916e-06
DIRAS1	0.631604	7.94959e-06
ZNF862	-0.344091	8.04207e-06
TADA3	0.178493	8.06723e-06
ZNF74	0.307292	8.0996e-06
NIPA2	-0.332937	8.10459e-06
SPINT1	-0.210687	8.10673e-06
GTPBP2	-0.389697	8.13066e-06
TMEM214	0.290695	8.19716e-06
PCSK1N	0.911506	8.31596e-06
CPNE3	-0.24507	8.43526e-06
ACOX1	-0.178147	8.54655e-06
TET3	-0.25491	8.62948e-06
BAHCC1	0.426069	8.65371e-06
GPAM	-0.365501	8.69184e-06
SLC3A2	0.245432	8.84373e-06
NDRG1	-0.470286	8.91437e-06
SPRYD3	0.275003	8.95346e-06
SEPP1	-0.35131	9.23886e-06
MMP16	0.39006	9.27612e-06
USF2	0.315587	9.2841e-06
ACAP2	-0.30854	9.56908e-06
FAM63B	-0.572639	9.57241e-06
C5orf51	-0.345857	9.59906e-06
ATP5G1	0.255183	9.64423e-06
SCFD1	-0.2209	9.86848e-06
CLSTN1	0.187321	1.01084e-05
ZBTB24	-0.28652	1.01131e-05
NFIX	0.172576	1.01137e-05
PIDD	0.501487	1.02248e-05
LRRC16B	1.07764	1.02329e-05
KDELR2	0.24534	1.05978e-05
ITPR2	-1.11782	1.06029e-05
TRAPPC11	-0.321029	1.0961e-05
TSTA3	0.25942	1.0961e-05
RPS15A	0.336932	1.09663e-05
ACTR2	-0.357019	1.12222e-05
MAP3K5	-0.535612	1.1374e-05
ZNF292	-0.298462	1.14486e-05
C19orf10	0.255038	1.14741e-05
RNF38	-0.346351	1.14741e-05
EXOC4	-0.35668	1.15695e-05
EDF1	0.193698	1.15902e-05
EEF1B2	0.167844	1.1603e-05
SLC16A10	0.565636	1.18145e-05
PTK7	0.370157	1.18364e-05
CALU	-0.242335	1.18748e-05
ZFR	-0.206438	1.21617e-05
TEX264	0.217308	1.21723e-05
MAP2K6	0.675201	1.26555e-05
MPV17	-0.414951	1.27695e-05
NPC1	-0.176831	1.28128e-05
ARFGAP3	-0.26885	1.28633e-05
RBM14	0.268615	1.30152e-05
GCFC2	-0.351053	1.30388e-05
CDT1	0.262292	1.34132e-05
FNIP2	-0.249633	1.35606e-05
SLC7A6	0.236974	1.38323e-05
ISOC1	0.256796	1.38519e-05
HCFC1	0.188759	1.38674e-05
C21orf91	-0.719933	1.39033e-05
FDPS	-0.18005	1.39059e-05
PI4K2A	0.249635	1.39159e-05
CDC42	-0.266476	1.41618e-05
SAMHD1	-0.250534	1.43827e-05
TDG	-0.449353	1.43827e-05
COQ4	0.250485	1.46309e-05
DNAJC18	0.480605	1.4659e-05
SEH1L	-0.348937	1.4659e-05
C17orf58	-0.997255	1.46622e-05
MST4	0.421468	1.46678e-05
C8orf33	-0.257073	1.46777e-05
ZNF552	-0.356511	1.47832e-05
C16orf72	-0.242981	1.48414e-05
GK5	-0.320237	1.49081e-05
FRMD4B	-1.53217	1.4973e-05
LOC100507501	-0.642794	1.4973e-05
SART3	-0.268504	1.50725e-05
NXPH4	0.35493	1.51307e-05
PPP2R2D	-0.215846	1.51758e-05
GRHPR	0.270159	1.53041e-05
KIAA1244	-0.122301	1.54209e-05
CLOCK	-0.432916	1.55631e-05
TMPRSS9	-1.20413	1.56042e-05
LOC147727	0.254795	1.57828e-05
HECTD1	-0.159015	1.59931e-05
AFMID	0.353218	1.60009e-05
HPS6	0.247295	1.60419e-05
AEBP2	-0.410716	1.6139e-05
STYK1	-0.678991	1.63245e-05
AASDHPPT	0.295608	1.63397e-05
BRDT	1.10193	1.63773e-05
TCEAL3	0.567188	1.63924e-05
NDUFB2	0.343625	1.66061e-05
SLC23A2	0.372262	1.67357e-05
LRFN2	-1.71501	1.67765e-05
FBXO7	0.318524	1.68264e-05
DPYSL4	0.610163	1.68392e-05
RPL14	0.203383	1.68922e-05
DHRS2	-0.868522	1.75417e-05
TCOF1	0.197718	1.7759e-05
RAB39B	0.614693	1.77773e-05
ADK	-0.408159	1.78122e-05
ARHGAP39	0.428454	1.78133e-05
PIGV	0.31772	1.85826e-05
CTBP2	0.226454	1.85836e-05
CTDNEP1	0.182383	1.88737e-05
NR3C2	0.408633	1.90888e-05
PLD1	-0.557566	1.90888e-05
XRCC3	0.287622	1.91636e-05
PHLDA3	0.268347	1.94529e-05
SRSF5	-0.155391	1.96484e-05
EID2	0.438857	1.96552e-05
ZER1	-0.211198	1.98363e-05
C15orf17	-0.230102	2.08464e-05
OLA1	0.168988	2.10627e-05
AJUBA	0.341877	2.11758e-05
RABGGTB	-0.255165	2.13109e-05
CDS1	-0.289618	2.13965e-05
MCM9	-0.496764	2.15913e-05
TUSC3	0.237735	2.1867e-05
ZNF507	-0.319637	2.19562e-05
PPAT	-0.165423	2.21927e-05
TTC3	0.158715	2.21927e-05
UBE2O	0.161817	2.24817e-05
SMARCD3	0.5169	2.26653e-05
NDUFS8	0.212858	2.27146e-05
HAX1	0.216324	2.29764e-05
SLC29A4	0.602131	2.3004e-05
INPP5A	-0.360199	2.30924e-05
C12orf75	0.567236	2.31761e-05
WDR7	-0.309568	2.32296e-05
FBXO44	0.361488	2.32976e-05
QRICH2	0.434749	2.33583e-05
ATAD2	-0.312318	2.3414e-05
EFR3B	1.2995	2.34499e-05
SLC39A8	0.244425	2.34499e-05
DDX6	-0.193061	2.34729e-05
C14orf135	-0.309328	2.36863e-05
ZCCHC8	-0.262796	2.404e-05
VSIG10	-0.229938	2.45393e-05
DAK	0.155663	2.45977e-05
FBXO11	-0.239345	2.46962e-05
RFC5	0.21352	2.48649e-05
BACE1	-0.250875	2.49679e-05
SLC12A7	0.285777	2.50558e-05
STK25	0.188639	2.52595e-05
FBXO25	0.285941	2.52975e-05
C21orf56	0.413086	2.53527e-05
FAM120A	-0.146056	2.54188e-05
RALGPS1	0.43441	2.56348e-05
SNAPC3	-0.29116	2.58447e-05
CYB5A	-0.200704	2.59826e-05
LOC286189	-0.989666	2.59889e-05
USP43	-0.418693	2.65745e-05
IPMK	-0.585924	2.66442e-05
ZNF780A	-0.503125	2.67025e-05
PHF12	0.181866	2.71265e-05
RPS16	0.239424	2.71467e-05
BTN3A3	0.529748	2.72939e-05
WAC	-0.149641	2.73336e-05
NUDT5	0.231767	2.73417e-05
MTIF2	-0.276463	2.74739e-05
LRP12	-0.487333	2.77503e-05
ZFYVE16	-0.304552	2.78539e-05
FARSA	0.183919	2.79563e-05
TOE1	0.404768	2.89871e-05
EPHX4	0.638314	2.89969e-05
TRIM5	-0.282033	2.90113e-05
HEBP1	0.312501	2.90151e-05
UQCRC1	0.116082	2.91009e-05
ACLY	-0.115923	2.96215e-05
C19orf54	0.391284	2.96338e-05
MAP2K2	0.271757	2.9942e-05
DCTN6	-0.302803	3.01218e-05
AP2M1	0.237254	3.02469e-05
SYAP1	-0.310391	3.02727e-05
TMF1	-0.3184	3.02727e-05
WBP4	-0.437169	3.02727e-05
RFFL	-0.83782	3.03553e-05
SLC25A38	0.216006	3.04051e-05
TMEM41A	-0.282629	3.066e-05
RTCD1	-0.291601	3.10321e-05
TAF2	-0.255857	3.1101e-05
FAM214B	-0.612463	3.14169e-05
TGS1	-0.225655	3.14169e-05
LMLN	-0.442858	3.14903e-05
SLC44A1	0.234127	3.23848e-05
RABEP2	-0.473066	3.2763e-05
FDX1L	0.399725	3.27964e-05
SAT2	0.268998	3.27964e-05
PTGFR	0.420873	3.31406e-05
C9orf16	0.379614	3.32843e-05
TMEM9	0.269807	3.38631e-05
SCAF11	-0.216709	3.39017e-05
ATPAF1	-0.145113	3.39861e-05
CLPX	-0.243384	3.41366e-05
GATC	0.198683	3.41366e-05
MALL	-2.20764	3.457e-05
USP53	-0.440506	3.47097e-05
SPG11	-0.199539	3.49018e-05
C4orf48	0.931818	3.50161e-05
ADCY9	0.362629	3.50331e-05
FAM126B	-0.447138	3.51166e-05
CCNY	0.229812	3.51647e-05
DAB2IP	0.423916	3.52785e-05
RAD51C	0.266068	3.62332e-05
TFPI	0.44993	3.71529e-05
COG4	-0.183108	3.71611e-05
ARHGAP18	-0.38515	3.80282e-05
BRSK1	2.16686	3.80526e-05
JAM3	0.962001	3.83595e-05
SH3RF3	1.35527	3.84046e-05
ECI1	0.37343	3.95867e-05
SBK1	0.410448	4.03095e-05
TOMM70A	-0.321374	4.07115e-05
URI1	-0.197753	4.08692e-05
NUFIP2	-0.205149	4.11948e-05
MREG	-0.534083	4.15865e-05
AKAP11	-0.341927	4.18465e-05
CTNNAL1	0.19925	4.23817e-05
ERLIN1	-0.368904	4.2859e-05
IL6R	-0.309835	4.2859e-05
IFFO2	0.483501	4.29255e-05
CEP170	0.33663	4.33129e-05
NFU1	0.405635	4.33938e-05
RAB3GAP1	-0.185938	4.39778e-05
SLC39A9	-0.232072	4.43412e-05
TMED3	-0.252166	4.44852e-05
CCDC88C	-0.296797	4.48127e-05
CUL7	0.332573	4.51338e-05
ALG12	0.214628	4.56193e-05
ECHS1	-0.114147	4.58804e-05
MVD	-0.370673	4.59628e-05
INO80D	-0.425633	4.6625e-05
LACTB2	-0.490301	4.66554e-05
KCNJ3	0.375533	4.69617e-05
EMD	0.338627	4.75345e-05
CRTC3	0.378612	4.75624e-05
CD47	-0.434296	4.76181e-05
SUMO2	0.244683	4.79525e-05
DDX49	0.218792	4.87189e-05
DSTN	-0.289909	4.87189e-05
MPG	0.389509	4.88404e-05
ABI1	-0.260992	4.92739e-05
RPL29	0.165717	4.99945e-05
DOCK3	0.492828	5.00555e-05
ZCCHC14	-0.26705	5.04319e-05
AGGF1	-0.370179	5.04727e-05
KREMEN2	1.09151	5.04919e-05
LRRC7	-0.866304	5.07835e-05
C7orf42	0.177812	5.09858e-05
PRSS8	-0.280275	5.22961e-05
ANAPC13	-0.237315	5.2385e-05
OAF	0.460811	5.2385e-05
NPM3	0.218621	5.26385e-05
PAPSS1	0.292858	5.27787e-05
SEC22B	-0.177594	5.2982e-05
FRK	-0.926145	5.30324e-05
DPYSL5	0.372679	5.35465e-05
SQRDL	-0.431543	5.39514e-05
GPER	0.370847	5.4269e-05
SSH2	-0.352963	5.43393e-05
SERINC2	-0.249145	5.49662e-05
PARN	-0.258734	5.49883e-05
LMNA	0.333392	5.55352e-05
PRKAR1B	0.394447	5.55951e-05
SGTA	0.243707	5.56055e-05
CDADC1	0.516668	5.67287e-05
MUL1	0.332045	5.69614e-05
HS6ST1	0.419321	5.87882e-05
STAG2	-0.277376	5.94781e-05
SMPD1	0.240552	5.96099e-05
FAM214A	-0.25499	6.05268e-05
ABCD4	0.469718	6.25201e-05
MANBA	-0.374435	6.25201e-05
ATP13A1	0.211044	6.26021e-05
NUDT22	0.29591	6.279e-05
FLJ22184	0.320433	6.43737e-05
PEX6	-0.432155	6.48125e-05
SDF2L1	0.54918	6.50599e-05
COPG1	0.164051	6.50992e-05
ANKIB1	-0.210044	6.56656e-05
LYNX1	0.317824	6.57193e-05
STIP1	0.188351	6.62371e-05
SLC2A11	0.405459	6.62943e-05
TXLNG2P	-0.403264	6.68997e-05
AAK1	-0.193033	6.69573e-05
CASKIN1	0.741936	6.7495e-05
CDK5	0.314276	6.7831e-05
GTF3C6	-0.396418	6.80241e-05
C1orf210	0.408176	6.82277e-05
MMAB	-0.212184	6.86273e-05
CTC1	-0.274931	6.86559e-05
ALDH3A2	-0.154862	6.87794e-05
GTF2F1	0.260899	6.98416e-05
ZNF605	-0.390715	7.03875e-05
FKBP4	-0.147665	7.05212e-05
HDHD3	-0.380057	7.15068e-05
VASN	0.459883	7.21259e-05
PEX1	-0.377996	7.24447e-05
ADAM7	-0.499346	7.27783e-05
ELOVL5	-0.155421	7.27783e-05
CDC14B	0.596648	7.34088e-05
C16orf87	-0.398436	7.3832e-05
POLR3B	-0.358027	7.386e-05
TRAPPC8	-0.23353	7.41043e-05
GNL3	-0.297608	7.41596e-05
HIST1H2AI	1.06809	7.43756e-05
TMEM205	0.234132	7.54056e-05
KLHL1	-0.358183	7.55402e-05
ABCA12	-0.634509	7.55463e-05
40787	-0.217458	7.60271e-05
DNAJB9	-0.691245	7.67173e-05
PDIA4	0.184486	7.67173e-05
TMEM25	0.237766	7.67173e-05
CCNYL1	0.362211	7.7058e-05
TMEM198	1.09093	7.7058e-05
ZNF71	0.462466	7.76861e-05
HIST1H1C	0.341826	7.78858e-05
SNIP1	-0.324962	7.78858e-05
PPP1R21	-0.350622	7.82934e-05
COX5A	0.121443	7.84007e-05
ABL2	-0.271423	7.92287e-05
GATSL3	-0.489741	7.92397e-05
SLC2A8	0.421784	7.92397e-05
SMYD4	0.244859	7.92397e-05
ERRFI1	-0.272189	7.95176e-05
MRPL28	0.323797	7.98073e-05
CSGALNACT2	0.446053	8.02048e-05
ZC3H6	-0.831101	8.11566e-05
SPECC1L	-0.146688	8.17354e-05
GGH	0.289887	8.21927e-05
C1orf124	-0.38711	8.24745e-05
GLB1	-0.284421	8.3165e-05
OXSR1	-0.178299	8.3165e-05
TMBIM1	-0.329553	8.3165e-05
MRPL34	0.506001	8.3857e-05
SPR	0.35797	8.42563e-05
FAM125A	0.37942	8.50367e-05
ISOC2	0.296473	8.61758e-05
RELL2	0.962659	8.63618e-05
LOC150381	0.50162	8.65983e-05
SEPSECS	-0.389211	8.70665e-05
GRIN1	-0.788482	8.71253e-05
OPA1	-0.234189	8.73708e-05
PATZ1	-0.31279	8.82071e-05
MRPL23	0.320451	8.96509e-05
PUS7L	-0.434008	8.98157e-05
FAF2	-0.13591	9.02502e-05
CYB5B	0.143144	9.20747e-05
MRPL30	-0.181118	9.23044e-05
CCDC92	-0.856291	9.26584e-05
ATP6V1D	-0.20585	9.28151e-05
PPT1	0.257888	9.2827e-05
CNST	-0.425791	9.37053e-05
TOMM22	0.178089	9.3967e-05
RAB30	-0.669985	9.44074e-05
CUEDC2	0.204465	9.48821e-05
IMPA2	-0.427856	9.48821e-05
SMYD3	-0.335646	9.51298e-05
LOC100289341	0.426487	9.62917e-05
PIP4K2B	0.183913	9.73317e-05
CEP19	0.547348	9.85273e-05
SIVA1	0.514657	9.90199e-05
ATP11A	-0.177008	9.99892e-05
TP53I11	0.451602	0.000100303
MECP2	-0.213038	0.000100752
C6orf108	0.448175	0.000100972
RALGAPA1	-0.313173	0.000101508
AGBL5	0.255323	0.000101671
MAST1	0.60326	0.000101671
BAZ1A	-0.284907	0.000101931
NENF	0.316572	0.000102444
CBR4	-0.314824	0.000102448
UFC1	0.211555	0.000102448
ZNRF2	-0.442996	0.000102448
KLK4	0.285306	0.000102618
TTC30A	-0.372388	0.000102767
ABCC1	0.187679	0.000102815
ZHX2	-0.363304	0.000103154
HSF1	0.255649	0.000103524
FAM160B1	-0.388291	0.000104211
[truncated: 1,511 more rows]
